# Supplementary material for: Rates and Predictors of Treatment Failure in Staphylococcus aureus Prosthetic Joint Infections According to Different Management Strategies: A Multinational Cohort Study—The ARTHR-IS Study Group
Source: Springer Nature journal article supplement (doi:10.1007/s40121-022-00701-0), 2022-10-15

**Rates and predictors of treatment failure in *Staphylococcus aureus* prosthetic joint infections according to different management strategies: a multinational cohort study. The ARTHR-IS study group.**

**Authors:**

Reinaldo Espíndola <sup>1</sup>, Venanzio Vella <sup>2</sup>, Natividad Benito <sup>3</sup>, Isabel Mur <sup>4</sup>, Sara Tedeschi <sup>5</sup>, Eleonora Zamparini <sup>6</sup>, Johannes G.E. Hendriks <sup>7</sup>, Luisa Sorlí <sup>8</sup>, Oscar Murillo <sup>9</sup>, Laura Soldevila <sup>10</sup>, Mathew Scarborough <sup>11</sup>, Claire Scarborough <sup>12</sup>, Jan Kluytmans <sup>13</sup>, Mateo Carlo Ferrari <sup>14</sup>, Mathias W. Pletz <sup>15</sup>, Iain Mcnamara <sup>16</sup>, Rosa Escudero-Sanchez <sup>17</sup>, Cedric Arvieux <sup>18</sup>, Cecile Batailler <sup>19</sup>, Frédéric-Antoine Dauchy <sup>20</sup>, Wai-Yan Liu <sup>21</sup>, Jaime Lora-Tamayo <sup>22</sup>, Julia Praena <sup>23</sup>, Andrew Ustianowski <sup>24</sup>, Elisa Cinconze <sup>2</sup>, Michele Pellegrini <sup>2</sup>, Fabio Bagnoli <sup>2</sup>, Jesús Rodríguez-Baño\* <sup>25</sup>, Maria Dolores del Toro <sup>26\*</sup> and the ARTHR-IS group\*\*

**Affiliations:**

1 Infectious Diseases and Microbiology Clinical Unit, Hospital Universitario Virgen Macarena, Seville, Spain. At present: Infectious Diseases and Microbiology Clinical Unit, Hospital Universitario Virgen de Valme, Seville, Spain.

2 GSK, Siena, Italy.

3 Infectious Diseases Unit, Hospital de la Santa Creu i Sant Pau /Sant Pau Institute for Biomedical Research, Barcelona, Spain. Department of Medicine, Universitat Autònoma de Barcelona, Barcelona, Spain. ORCID: 0000-0001-6410-013X.

4 Infectious Diseases Unit, Hospital de la Santa Creu i Sant Pau /Sant Pau Institute for Biomedical Research, Barcelona, Spain. Department of Medicine, Universitat Autònoma de Barcelona, Barcelona, Spain.

5 Department of Medical and Surgical Sciences, University of Bologna, Bologna, Italy. Infectious Diseases Unit, IRCCS Azienda Ospedaliero Universitaria di Bologna, Bologna, Italy. ORCID: 0000-0001-9546-2811.

6 Infectious Diseases Unit, IRCCS Azienda Ospedaliero Universitaria di Bologna, Bologna, Italy.

7 Department of Orthopaedic Surgery & Trauma, Máxima MC, Eindhoven, the Netherlands.

8 Department of Infectious Diseases, Hospital del Mar, Institut Hospital del Mar d'Investigacions Mèdiques (IMIM), Barcelona, Spain. Universitat Pompeu Fabra, Barcelona, Spain.

9 Department of Infectious Diseases, Hospital Universitari Bellvitge. IDIBELL, Barcelona, Spain. ORCID: 0000-0003-1938-3905.

10 Department of Infectious Diseases, Hospital Universitari Bellvitge. IDIBELL, Barcelona, Spain.

11 Bone Infection Unit, Nuffield Orthopaedic Centre, Oxford University Hospitals NHS Foundation Trust, Oxford, UK. ORCID: 0000-0002-0455-0785.

12 Bone Infection Unit, Nuffield Orthopaedic Centre, Oxford University Hospitals NHS Foundation Trust, Oxford, UK.

13 Department of Infection Control, Amphia Hospital, Breda, the Netherlands. Department of medical microbiology, University Medical Center Utrecht, Utrecht University, Utrecht, the Netherlands.

14 Prosthetic-Joint Replacement Unit, Humanitas Research Hospital, Milano, Italy.

15 Center for Infectious Diseases and Infection Control, Jena University Hospital, Jena, Germany. ORCID: 0000-0001-8157-2753.

16 Department of Orthopaedics, Norfolk and Norwich University Hospital, Norwich, UK.

17 Department of Infectious Diseases, Hospital Universitario Ramón y Cajal, Madrid, Spain. CSIC and Centro de Investigación Biomédica en Red en Enfermedades Infecciosas (CIBERINFEC), Spain.

18 Department of Infectious Diseases, Centre Hospitalier Universitaire de Rennes, Rennes, France.

19 Orthopedic Surgery Department, Croix Rousse Hospital, Lyon, France.

20 Department of Infectious and Tropical Diseases, Centre Hospitalier Universitaire de Bordeaux, Bordeaux, France.

21 Department of Orthopaedic Surgery & Trauma, Catharina Hospital, Eindhoven, The Netherlands. Department of Orthopaedic Surgery & Trauma, Máxima MC, Eindhoven, the Netherlands.

22 Department of Internal Medicine, Hospital Universitario 12 de Octubre, Madrid, Spain.

23 Clinical Unit of Infectious Diseases, Microbiology and Preventive Medicine, Hospital Universitario Virgen del Rocío, Sevilla, Spain.

24 Infectious Diseases Unit, North Manchester General Hospital, Manchester, UK.

25 Infectious Diseases and Microbiology Clinical Unit, Hospital Universitario Virgen Macarena, Seville, Spain. Department of Medicine, University of Sevilla / Biomedicine Institute of Sevilla (IBiS), Seville. CSIC and Centro de Investigación Biomédica en Red en Enfermedades Infecciosas (CIBERINFEC). Spain. ORCID: 0000-0001-6732-9001.

26 Infectious Diseases and Microbiology Clinical Unit, Hospital Universitario Virgen Macarena, Seville, Spain. Department of Medicine, University of Sevilla / Biomedicine Institute of Sevilla (IBiS), Seville. CSIC and Centro de Investigación Biomédica en Red en Enfermedades Infecciosas (CIBERINFEC). Spain. ORCID: 0000-0002-4935-8754.

\*Jesús Rodríguez-Baño and María Dolores del Toro contributed equally as senior authors of the study.

\*\*Other members of the ARTHR-IS group are listed in Acknowledgements.

**Corresponding author:** María Dolores del Toro

Contact: phone +34 653937488, e-mail: mdeltoro@us.es, Postal address: Unidad de Enfermedades Infecciosas y Microbiología Clínica, Hospital Universitario Virgen Macarena, Avda Dr Fedriani 3, 41009 Sevilla, Spain.

## Supplementary material

**Table S1. Checklist of items according to STROBE document.**

|                                                                                                                                                                                                                                                        |                                                                                                                                                                                                         |
|--------------------------------------------------------------------------------------------------------------------------------------------------------------------------------------------------------------------------------------------------------|---------------------------------------------------------------------------------------------------------------------------------------------------------------------------------------------------------|
| <p><b>Title and abstract</b></p> <p>(a) Indicate the study design with a commonly used term in the title or abstract</p> <p>(b) Provide an informative and balanced summary in the abstract of what was done and what was found</p>                    | <p>Study design specified in title and abstract</p> <p>Balanced summary included in the abstract</p>                                                                                                    |
| <p><b>Background/rationale</b></p> <p>Explain the scientific background and rationale for the investigation being reported</p>                                                                                                                         | <p>The scientific background and rationale are included in the Introduction</p>                                                                                                                         |
| <p><b>Objectives</b></p> <p>State specific objectives, including any prespecified hypotheses</p>                                                                                                                                                       | <p>Pre-specified hypothesis and objectives are stated in the Introduction</p>                                                                                                                           |
| <p><b>Study design</b></p> <p>Present key elements of study design early in the paper</p>                                                                                                                                                              | <p>Study design described in the first part of Methods</p>                                                                                                                                              |
| <p><b>Setting</b></p> <p>Describe the setting, locations, and relevant dates, including periods of recruitment, exposure, follow-up, and data collection</p>                                                                                           | <p>Described in Methods</p>                                                                                                                                                                             |
| <p><b>Participants</b></p> <p>(a) Give the eligibility criteria and the sources and methods of selection of participants. Describe methods of follow-up</p> <p>(b) For matched studies, give matching criteria and number of exposed and unexposed</p> | <p>Described in Methods</p> <p>This is not a matched study</p>                                                                                                                                          |
| <p><b>Variables</b></p> <p>Clearly define all outcomes, exposures, predictors, potential confounders, and effect modifiers. Give diagnostic criteria, if applicable</p>                                                                                | <p>Defined in Methods</p>                                                                                                                                                                               |
| <p><b>Data sources/ measurement</b></p> <p>For each variable of interest, give sources of data and details of methods of assessment (measurement). Describe comparability of assessment methods if there is more than one group</p>                    | <p>Specified in Methods.</p>                                                                                                                                                                            |
| <p><b>Bias</b></p> <p>Describe any efforts to address potential sources of bias</p>                                                                                                                                                                    | <p>Selection bias: inclusion of consecutive cases.</p> <p>Information bias: use of well defined, standard, easy-to-collect variables (piloted).</p> <p>Immortal time bias: use of landmark analysis</p> |
| <p><b>Study size</b></p> <p>Explain how the study size was arrived at</p>                                                                                                                                                                              | <p>Not applicable. All cases detected in the study period were included.</p>                                                                                                                            |
| <p><b>Quantitative variables</b></p> <p>Explain how quantitative variables were handled in the analyses. If applicable, describe which groupings were chosen and why</p>                                                                               | <p>Some quantitative variables were categorized according to clinical criteria to facilitate multivariate analyses.</p>                                                                                 |
| <p><b>Statistical methods</b></p>                                                                                                                                                                                                                      |                                                                                                                                                                                                         |

|                                                                                                                                                                                                              |                                                         |
|--------------------------------------------------------------------------------------------------------------------------------------------------------------------------------------------------------------|---------------------------------------------------------|
| (a) Describe all statistical methods, including those used to control for confounding                                                                                                                        | Included in Methods                                     |
| (b) Describe any methods used to examine subgroups and interactions                                                                                                                                          | Included in Methods                                     |
| (c) Explain how missing data were addressed                                                                                                                                                                  | Patients with missing data were excluded                |
| (d) If applicable, explain how loss to follow-up was addressed                                                                                                                                               | Not applicable                                          |
| (e) Describe any sensitivity analyses                                                                                                                                                                        | Included in Methods                                     |
| <b>Participants</b>                                                                                                                                                                                          |                                                         |
| (a) Report numbers of individuals at each stage of study—eg numbers potentially eligible, examined for eligibility, confirmed eligible, included in the study, completing follow-up, and analyzed            | Included in Results (Figure 1)                          |
| (b) Give reasons for non-participation at each stage                                                                                                                                                         | Specified in Figure 1                                   |
| (c) Consider use of a flow diagram                                                                                                                                                                           | Figure 1                                                |
| <b>Descriptive data</b>                                                                                                                                                                                      |                                                         |
| (a) Give characteristics of study participants (eg demographic, clinical, social) and information on exposures and potential confounders                                                                     | Table 1, table S4                                       |
| (b) Indicate number of participants with missing data for each variable of interest                                                                                                                          | Figure 1                                                |
| (c) Summarize follow-up time (eg, average and total amount)                                                                                                                                                  | Information at 18 months was available for all patients |
| <b>Outcome data</b>                                                                                                                                                                                          |                                                         |
| Report numbers of outcome events or summary                                                                                                                                                                  | Figure 1, Figure S1, Table S3                           |
| <b>Main results</b>                                                                                                                                                                                          |                                                         |
| (a) Give unadjusted estimates and, if applicable, confounder-adjusted estimates and their precision (eg, 95% confidence interval). Make clear which confounders were adjusted for and why they were included | Specified in Results (Table 2)                          |
| (b) Report category boundaries when continuous variables were categorized                                                                                                                                    | Specified in methods                                    |
| (c) If relevant, consider translating estimates of relative risk into absolute risk for a meaningful time period                                                                                             | Not applicable                                          |
| <b>Other analyses</b>                                                                                                                                                                                        |                                                         |
| Report other analyses done—eg analyses of subgroups and interactions, and sensitivity analyses                                                                                                               | Specified in Methods and Results                        |
| <b>Key results</b>                                                                                                                                                                                           |                                                         |
| Summarize key results with reference to study objectives                                                                                                                                                     | Specified in Abstract and Discussion                    |
| <b>Limitations</b>                                                                                                                                                                                           |                                                         |
| Discuss limitations of the study, taking into account sources of potential bias or imprecision. Discuss both direction and magnitude of any potential bias                                                   | Included in Discussion                                  |
| <b>Interpretation</b>                                                                                                                                                                                        |                                                         |
| Give a cautious overall interpretation of results considering objectives, limitations, multiplicity of analyses, results from similar studies, and other relevant evidence                                   | Included in Discussion                                  |
| <b>Generalizability</b>                                                                                                                                                                                      |                                                         |
| Discuss the generalizability (external validity) of the study results                                                                                                                                        | Included in Discussion                                  |
| <b>Funding</b>                                                                                                                                                                                               |                                                         |
|                                                                                                                                                                                                              | Included                                                |

|                                                                                                                                                               |  |
|---------------------------------------------------------------------------------------------------------------------------------------------------------------|--|
| Give the source of funding and the role of the funders for the present study and, if applicable, for the original study on which the present article is based |  |
|---------------------------------------------------------------------------------------------------------------------------------------------------------------|--|

**Table S2. Definitions of the key variables used**

|                                                                                                                                                |                                                                                                                                                                                                                                                                                                                                                                                                                                                                                                                                                                                                                                                                                                                                                              |
|------------------------------------------------------------------------------------------------------------------------------------------------|--------------------------------------------------------------------------------------------------------------------------------------------------------------------------------------------------------------------------------------------------------------------------------------------------------------------------------------------------------------------------------------------------------------------------------------------------------------------------------------------------------------------------------------------------------------------------------------------------------------------------------------------------------------------------------------------------------------------------------------------------------------|
| <b>Inclusion criteria</b>                                                                                                                      |                                                                                                                                                                                                                                                                                                                                                                                                                                                                                                                                                                                                                                                                                                                                                              |
| Microbiologically confirmed hip or knee <i>S. aureus</i> prosthetic joint infection diagnosed within the first year after primary arthroplasty | (1) Clinical criteria: at least one sign or symptom of PJI, including joint pain and/or swelling, or a sinus tract communicating with the prosthesis, and (2) Isolation of <i>S. aureus</i> from: (a) one or more joint aspirate cultures; (b) two or more periprosthetic tissue samples; and (c) blood cultures with no other obvious source of infection.                                                                                                                                                                                                                                                                                                                                                                                                  |
| <b>Surgical procedures</b>                                                                                                                     |                                                                                                                                                                                                                                                                                                                                                                                                                                                                                                                                                                                                                                                                                                                                                              |
| Debridement, antibiotics, and implant retention (DAIR)                                                                                         | Surgical removal of infected and necrotic tissue and exchange of removable prosthetic components, i.e. polyethylene (plastic line) or mobile components (femoral head in some hip prostheses).                                                                                                                                                                                                                                                                                                                                                                                                                                                                                                                                                               |
| Prosthesis removal                                                                                                                             | Removal of part of the prosthesis components (“partial removal”) or of all components (“total removal”). After removal, the options are specified below.                                                                                                                                                                                                                                                                                                                                                                                                                                                                                                                                                                                                     |
| Prosthesis reimplantation                                                                                                                      | Implantation of a new prosthesis after removal of the previous one. This can be performed in one or two stages. Specific definitions<br>- Partial reimplantation: only one component is replaced. This is usually performed in acute infections when a component is loose (cup or femoral component in hips; femoral or tibial component in knees).<br>- Total reimplantation: all components are replaced.<br>- One-stage replacement: the component(s) are removed and reimplanted in the same surgical procedure.<br>- Two-stage replacement: the components(s) are replaced in two procedures: in the first, the component(s) are removed, a spacer with antibiotics is placed to maintain joint space, in the second, the component(s) are reimplanted. |
| Arthrodesis                                                                                                                                    | All articular and prosthetic material are removed, and a nail is placed in order to achieve a permanent fixed joint between the bones. It is more frequently performed in knees, usually as a two-stage procedure.                                                                                                                                                                                                                                                                                                                                                                                                                                                                                                                                           |
| Girdlestone resection                                                                                                                          | Resection of joint and prosthesis components without replacement and fixation in the hip.                                                                                                                                                                                                                                                                                                                                                                                                                                                                                                                                                                                                                                                                    |
| Limb amputation                                                                                                                                | Amputation of the limb proximal to the joint. Usually performed when all previous procedures have failed but a severe life-threatening infection is present.                                                                                                                                                                                                                                                                                                                                                                                                                                                                                                                                                                                                 |
| Additional debridement                                                                                                                         | Debridement(s) performed after any type of initial procedure performed, due to persistent surgical wound discharge, bleeding, haematoma or devitalized tissues without clear evidence of persistent infection.                                                                                                                                                                                                                                                                                                                                                                                                                                                                                                                                               |
| Additional procedures not due to persistent infection                                                                                          | Surgery on the prosthetic joint not performed to control infection, such as debridement to remove devitalized tissue and haematomas, dislocation, plastic or reconstructive surgery, etc.                                                                                                                                                                                                                                                                                                                                                                                                                                                                                                                                                                    |
| <b>Treatment failure</b>                                                                                                                       |                                                                                                                                                                                                                                                                                                                                                                                                                                                                                                                                                                                                                                                                                                                                                              |
| Death                                                                                                                                          | Death related to SA-PJI                                                                                                                                                                                                                                                                                                                                                                                                                                                                                                                                                                                                                                                                                                                                      |
| Clinical failure                                                                                                                               | For the first surgical procedure, any of the following: persistence/relapse of signs and symptoms of infection; need for additional course of antibiotics after the initial scheduled treatment; long-term suppressive antibiotic therapy; and removal of the prosthesis.<br>For all surgical procedures performed, any of the following: persistence of signs and symptoms of infection at month 18; long-term suppressive antibiotic therapy; and removal of the prosthesis.                                                                                                                                                                                                                                                                               |

|                             |                                                                                                                                                             |
|-----------------------------|-------------------------------------------------------------------------------------------------------------------------------------------------------------|
| Significant functional loss | Severe impairment of limb function that impedes walking or makes walking very difficult, including a Girdlestone resection, arthrodesis or limb amputation. |
|-----------------------------|-------------------------------------------------------------------------------------------------------------------------------------------------------------|

**Table S3. Summary of outcomes for the different analyses.**

|                          | Rate of failure<br>(95% CI) | Reason for failure |                  |                 |
|--------------------------|-----------------------------|--------------------|------------------|-----------------|
|                          |                             | Related mortality  | Clinical failure | Functional loss |
| First procedure          | 32.8 (25.2-41.3)            | 7.0%               | 21.1%            | 4.7%            |
| First procedure: DAIR    | 31.3 (22.9-41.0)            | 6.0%               | 23.3%            | 2.0%            |
| First procedure: removal | 37.9 (22.6-56.0)            | 10.3%              | 13.8%            | 13.8%           |
| All procedures           | 24.2 (17.5-32.3)            | 7.0%               | 8.5%             | 8.5%            |
| First procedure: DAIR    | 21.2 (14.2-30.0)            | 6.0%               | 9.0%             | 6.0%            |
| First procedure: removal | 34.4 (19.8-52.7)            | 10.3%              | 6.9%             | 17.2%           |

**Table S4. Characteristics of patients who underwent debridement, antibiotic therapy, and implant retention (DAIR) treated with and without rifampicin.**

| Variables                                    | Rifampicin adjuvant treatment, n= 84 (%) | No rifampicin adjuvant treatment, n=15 (%) | <i>p</i> value |
|----------------------------------------------|------------------------------------------|--------------------------------------------|----------------|
| Age ≥80 years                                | 18 (21.4)                                | 3.0 (20.0)                                 | 1              |
| Charlson index ≥2                            | 29 (34.5)                                | 7 (46.7)                                   | 0.394          |
| Haemoglobin <10 mg/dl                        | 28 (33.3)                                | 8 (53.3)                                   | 0.155          |
| C-reactive protein ≥100 mg/L                 | 31 (39.2)                                | 5 (35.7)                                   | 1              |
| Body mass index >30                          | 45 (53.6)                                | 12 (80)                                    | 0.087          |
| Hip fracture as the reason for arthroplasty  | 21 (25.0)                                | 4 (26.7)                                   | 1              |
| Radiological signs of infection <sup>a</sup> | 4 (9.0)                                  | 1 (12.5)                                   | 0.763          |
| Fever >38 °C                                 | 18 (21.4)                                | 4 (26.7)                                   | 0.737          |
| Sinus tract at diagnosis                     | 1 (1.2)                                  | 1 (6.7)                                    | 0.281          |
| Methicillin-resistant <i>S. aureus</i>       | 17 (20.2)                                | 3 (20.0)                                   | 1              |
| Polymicrobial infection                      | 23 (27.4)                                | 8 (53.3)                                   | 0.068          |
| Presence of bacteraemia                      | 14 (16.7)                                | 3 (20)                                     | 0.718          |
| Polyethylene/mobile component replacement    | 52 (61.9)                                | 6 (40)                                     | 0.155          |
| Days from symptom onset to surgery <21       | 74 (88.1)                                | 14 (93.3)                                  | 1              |
| Appropriate indication for DAIR <sup>b</sup> | 43 (51.2)                                | 5 (33.3)                                   | 0.266          |
| Inadequate empiric antimicrobial therapy     | 7 (10.8)                                 | 2 (22.2)                                   | 0.300          |

<sup>a</sup> Data available for 52 patients. Defined as presence of periprosthetic lucency or signs of prosthetic component loosening. <sup>b</sup> Performed <21 days from symptom onset to surgery, absence of sinus tract, and replacement of polyethylene or mobile components.

**Table S5. Approval of the ethics committee of all participating centers.**

| Hospital                                                          | Ethics Committee name                                                                                       | Reference Number |
|-------------------------------------------------------------------|-------------------------------------------------------------------------------------------------------------|------------------|
| Hospital Universitario Virgen Macarena. Seville, Spain.           | CEI de los Hospitales Universitarios Virgen Macarena y Virgen del Rocío<br><b>(Master Ethics Committee)</b> | 2019/030         |
| Hospital Universitario Virgen del Rocío. Sevilla, Spain           | CEI de los Hospitales Universitarios Virgen Macarena y Virgen del Rocío<br>(Master Ethics Committee)        | 2019/030         |
| Hospital Universitario Ramón y Cajal. Madrid, Spain               | CEI del HU Ramón y Cajal                                                                                    | 081/19           |
| Hospital Universitario 12 Octubre. Madrid, Spain                  | CEIm Hospital 12 de Octubre                                                                                 | Nº CEIm: 19/118  |
| Hospital Universitari Bellvitge. Barcelona, Spain.                | CE de la Investigación Clínica del HU de Bellvitge                                                          | Acta 07/19       |
| Hospital del Mar. Barcelona, Spain.                               | CEIm del Parc de Salut Mar                                                                                  | 2019/8500        |
| Hospital de la Santa Creu i Sant Pau /Sant Pau. Barcelona, Spain. | CEIm de la Fundació de Gestió Sanitària del Hospital de la                                                  | 19/080 (OBS)     |



|                                                                |                                                              |                        |
|----------------------------------------------------------------|--------------------------------------------------------------|------------------------|
|                                                                | Santa Creu i Sant Pau de Barcelona                           |                        |
| Humanitas Research Hospital. Milano, Italy                     | Comitato etico indipendente IRCCS Istituto Clinico Humanitas | 680/19                 |
| IRCCS Pol. S. Orsola. Bologna, Italy.                          | Comitato etico di Area Vasta Emilia Centro                   | 2836/2019              |
| Máxima Medical Center. Eindhoven, the Netherlands              | Central EC of the Netherlands                                | N19.031                |
|                                                                | Commissie Lokale Uitvoerbaarheid (Máxima Medisch centrum)    | 2019-047               |
| Amphia Hospital,.Breda, Netherlands                            | Central EC of the Netherlands                                | N19.031                |
|                                                                | CWC Amphia                                                   | 19.157                 |
| Catharina Hospital. Eindhoven, the Netherlands                 | Central EC of the Netherlands                                | N19.031                |
|                                                                | Catharina Ziekenhuis                                         | nWMO-2019.124          |
| Oxford University Hospitals NHS Foundation Trust. Oxofrd, UK.  | NHS Foundation Trust                                         | IRAS Reference: 265624 |
| Norfolk and Norwich University Hospital. Norwich, UK           | NHS Foundation Trust                                         | IRAS Reference: 265624 |
| North Manchester General Hospital                              | NHS Foundation Trust                                         | IRAS Reference: 265624 |
| Jena University Hospital. Jena, Germany                        | Universitats Klinikum Jena Ethik-Kommission                  | 2019-1408              |
| Centre Hospitalier Universitaire de Rennes. Rennes, France.    | CNIL                                                         | 2213705                |
| Croix Rousse Hospital. Lyon. France.                           | CNIL                                                         | 2213705                |
| Centre Hospitalier Universitaire de Bordeaux. Bordeaux, France | CNIL                                                         | 2213705                |

**Figure S1. Cumulative proportion of SA-PJIs occurring after primary arthroplasty.**

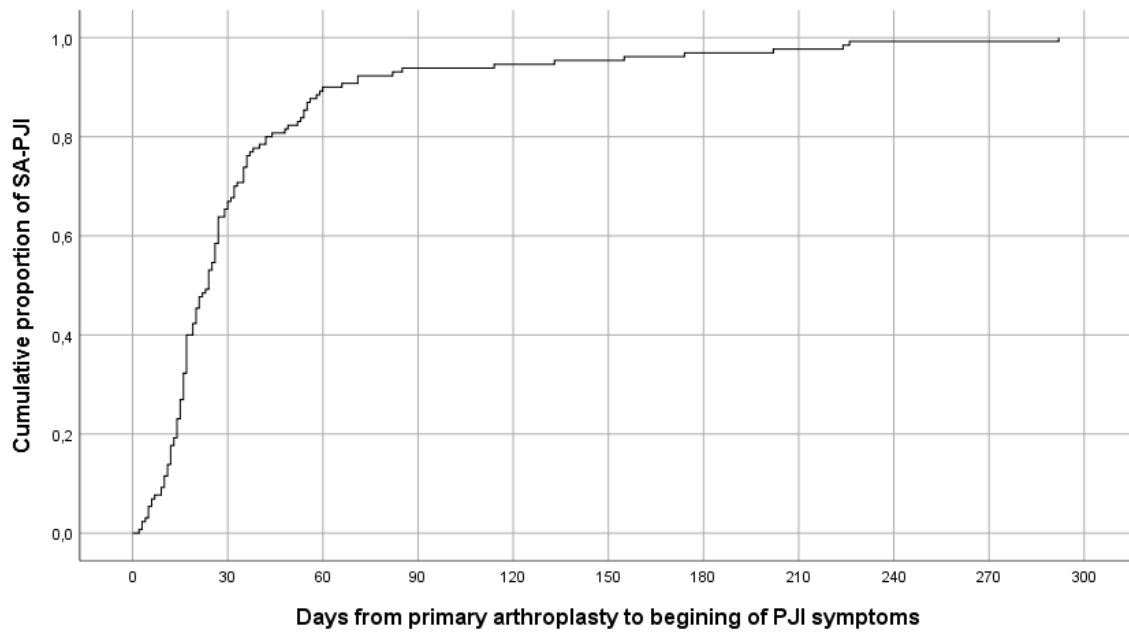

Supplement: MOESM1 [file 40121_2022_701_MOESM1_ESM.pdf]
